# Supplementary material for: Unassisted solar water splitting with 9.8% efficiency and over 100 h stability based on Si solar cells and photoelectrodes catalyzed by bifunctional Ni–Mo/Ni
Source: Royal Society of Chemistry journal article supplement (doi:10.1039/c8ta10165e), 2018-12-24
Supplement: c8ta10165e1.pdf [file c8ta10165e1.pdf]

Electronic Supplementary Material (ESI) for Journal of Materials Chemistry A

This journal is © The Royal Society of Chemistry 2018

**9.8%-efficient and above 100 h-stable unassisted solar water  
splitting based on Si solar cells and photoelectrodes catalyzed by  
bifunctional Ni-Mo/Ni**

**Supporting Information**

Ronglei Fan<sup>a,b</sup>, Shaobo Cheng<sup>c</sup>, Guanping Huang<sup>a</sup>, Yongjie Wang<sup>b</sup>, Yazhou Zhang<sup>b,d</sup>,  
Srinivas Vanka<sup>b</sup>, Gianluigi A. Botton<sup>c</sup>, Zetian Mi<sup>b,\*</sup> and Mingrong Shen<sup>a,\*</sup>

<sup>a</sup>School of Physical Science and Technology, Jiangsu Key Laboratory of Thin Films,  
and Collaborative Innovation Center of Suzhou Nano Science and Technology,  
Soochow University, 1 Shizi street, Suzhou 215006, China.

<sup>b</sup>Department of Electrical Engineering and Computer Science, Center for Photonics and  
Multiscale Nanomaterials, University of Michigan, 1301 Beal Avenue, Ann Arbor, MI  
48109, United States.

<sup>c</sup>Department of Materials Science and Engineering, Canadian Centre for Electron  
Microscopy, McMaster University, 1280 Main Street West, Hamilton, Ontario,  
L8S4M1, Canada.

<sup>d</sup>International Research Center for Renewable Energy, Xi'an Jiaotong University, 28  
West Xianning Road, Xi'an 710049, China.

**\*Corresponding Author**

Email: ztmi@umich.edu, Tel: 1 734 764 3963.

E-mail: mrshen@suda.edu.cn, Tel: 0086-0512-65112066.

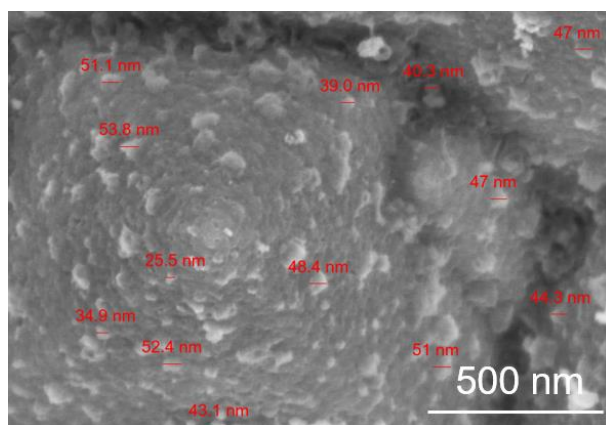

Fig. S1. Higher magnification surface SEM images of Ni-Mo/Ni/ $n^{++}$ -Si, showing the mean size of Ni-Mo particles.

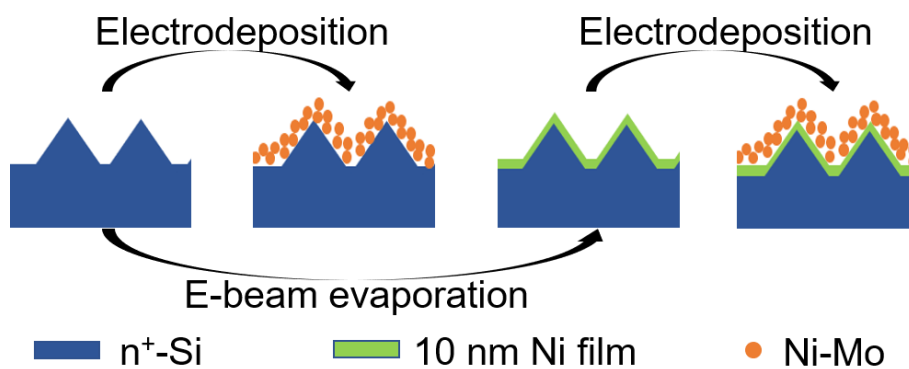

Fig. S2. Schematic representation of the fabrication procedures of Ni-Mo catalyst on  $n^{++}$ -Si and Ni/ $n^{++}$ -Si surfaces.

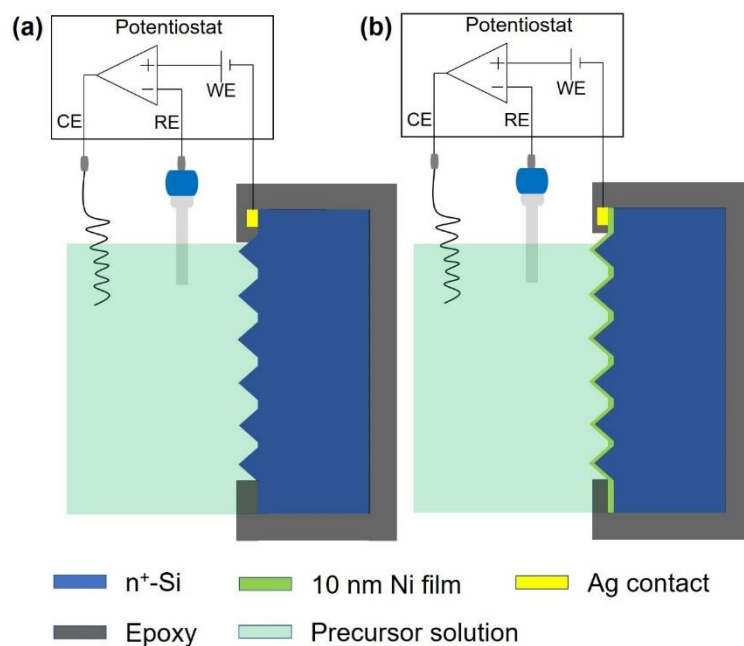

Fig. S3. Schematic overview of the electrodeposition setup of Ni-Mo catalyst for  $n^+$ -Si and Ni/ $n^+$ -Si with micro-pyramid textured surface.

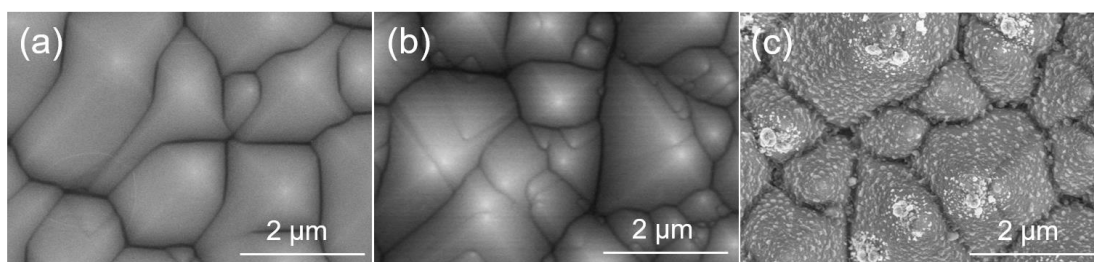

Fig. S4. Top-view SEM images of Ni/ $n^+$ -Si,  $n^+$ -Si and Ni-Mo/ $n^+$ -Si.

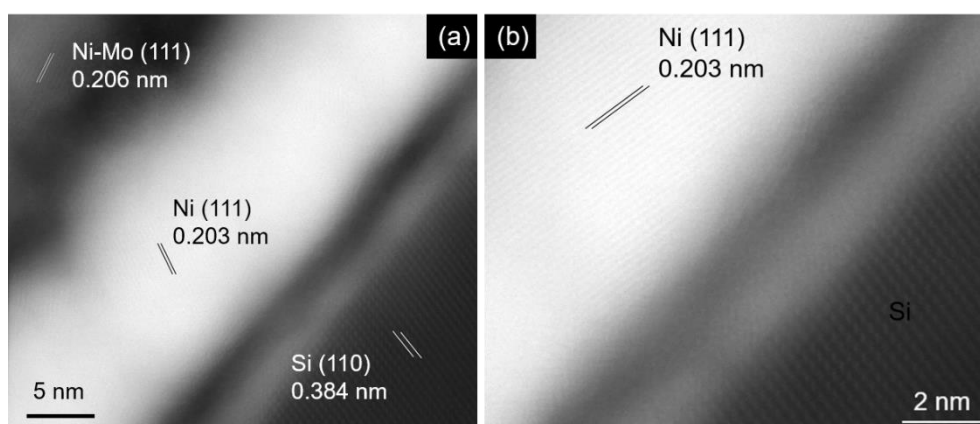

Fig. S5. Cross-sectional HR-TEM image of the as-synthesized Ni-Mo/Ni/ $n^+$ -Si electrode to show the interface of (a) Ni-Mo, Ni and Si and (b) Ni and Si more clearer.

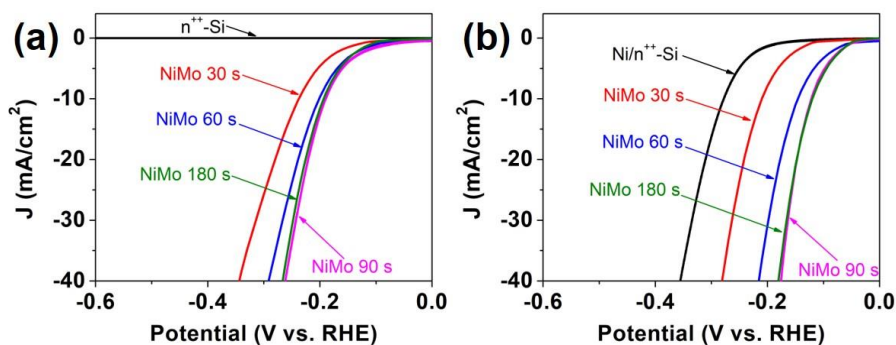

Fig. S6. LSV curves of Ni-Mo catalyst with various loading amount on (a)  $n^{++}$ -Si and (b)  $Ni/n^{++}$ -Si electrodes for HER. The amount of Ni-Mo catalyst on  $n^{++}$ -Si and  $Ni/n^{++}$ -Si electrodes was controlled by the deposition time of electrodeposition. The deposition time of 90 s exhibits the best HER electrocatalytic performance for both the  $n^{++}$ -Si and  $Ni/n^{++}$ -Si electrodes.

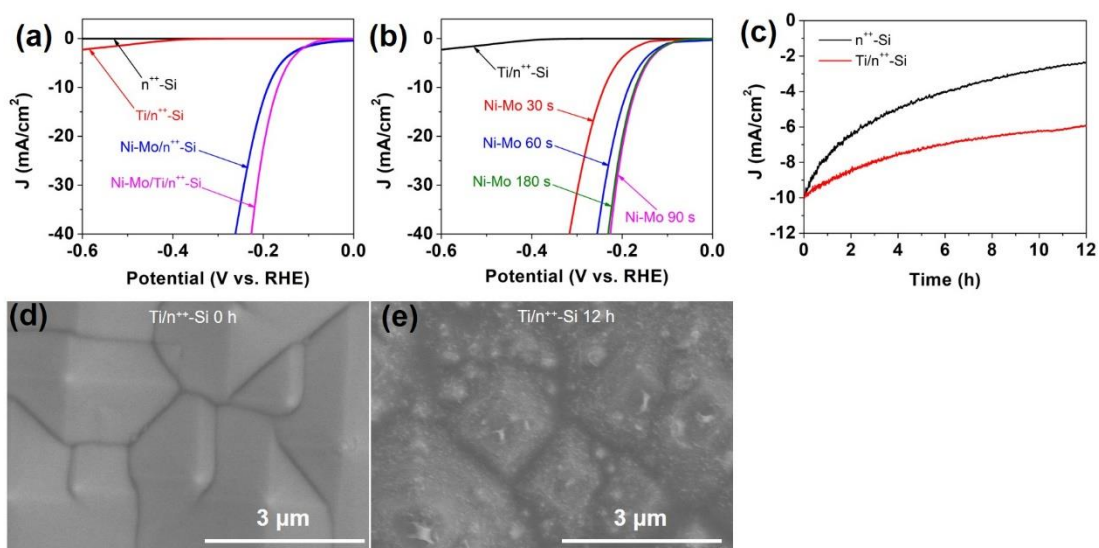

Fig. S7. Effect of the Ti buffer layer on HER electrocatalytic activities and long-term stability for  $n^{++}$ -Si and  $Ni-Mo/n^{++}$ -Si electrodes in 1 M KOH. (a) LSV curves of  $n^{++}$ -Si electrodes with and without Ni-Mo catalyst layer and/or 10 nm Ti buffer layer. (b) LSV curves of Ni-Mo catalyst with various loading amount on  $Ti/n^{++}$ -Si electrodes. (c) Chronoamperometric  $J-t$  test for  $n^{++}$ -Si and  $Ti/n^{++}$ -Si electrodes at a constant potential to achieve a current density of  $-10 \text{ mA/cm}^2$  for 12 h of continuous electrochemical  $H_2$  evolution, respectively. Top-view SEM images of  $Ti/n^{++}$ -Si electrode (d) before and (e)

after 12 h of continuous electrochemical H<sub>2</sub> evolution.

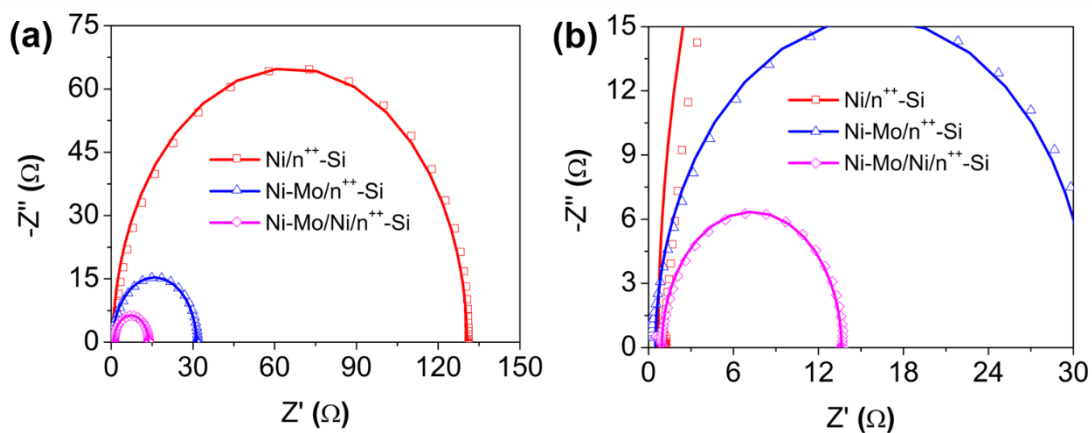

Fig. S8. (a) Nyquist plots for Ni, Ni-Mo and Ni-Mo/Ni catalysts on  $n^{++}$ -Si substrates at  $-0.1 V_{RHE}$  in 1 M KOH under AM 1.5G one sun illumination. (b) A detailed Nyquist plots for (a) at high frequency region.

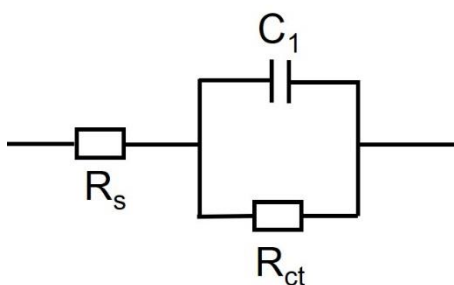

Fig. S9. The equivalent circuit model corresponding to the charge transfer from the  $n^{++}$ -Si to the electrolyte through a catalyst. The equivalent circuit elements include a series resistance ( $R_s$ ) in series with a parallel arrangement of a resistor ( $R_{ct}$ ) and a constant phase element ( $C_1$ ).

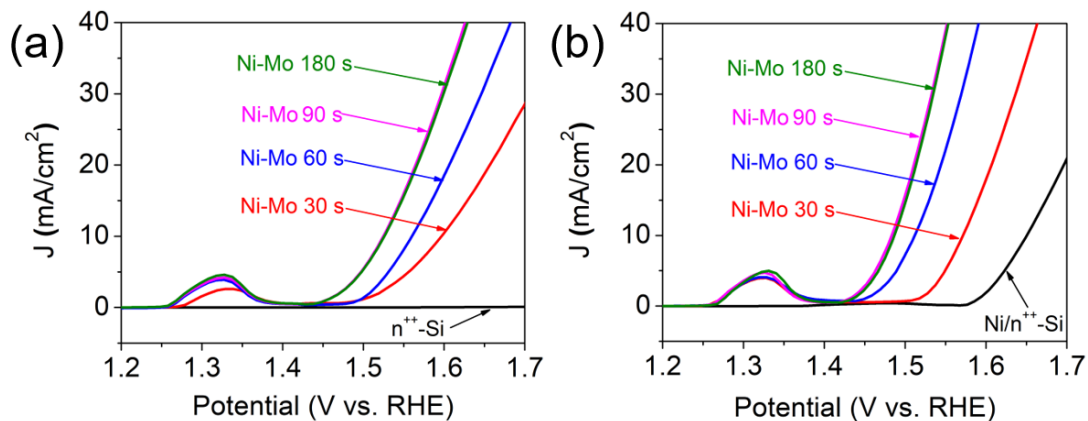

Fig. S10. LSV curves of Ni-Mo catalyst with various loading amount on (a)  $n^{++}$ -Si and (b)  $Ni/n^{++}$ -Si electrodes for OER.

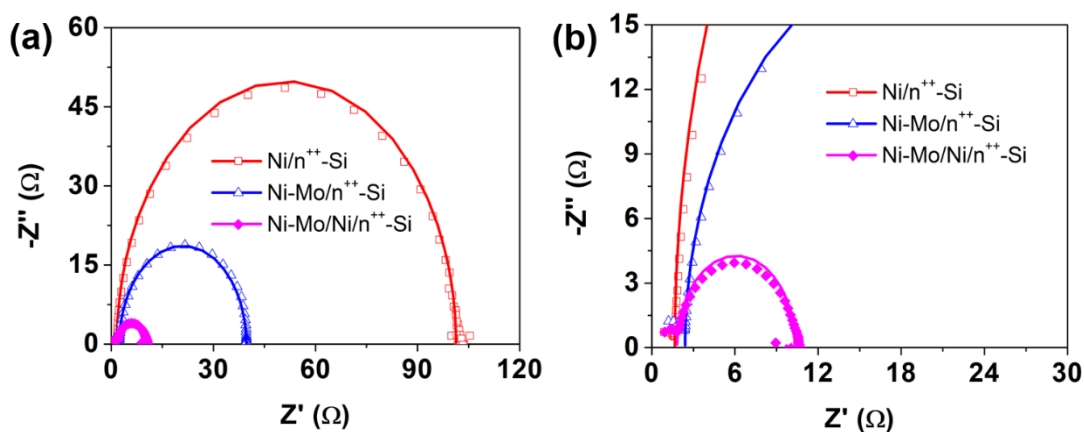

Fig. S11. (a) Nyquist plots for Ni, Ni-Mo and Ni-Mo/Ni catalysts on  $n^{++}$ -Si substrates at 1.3  $V_{RHE}$  in 1 M KOH under AM 1.5G one sun illumination. (b) A detailed Nyquist plots for (a) at high frequency region.

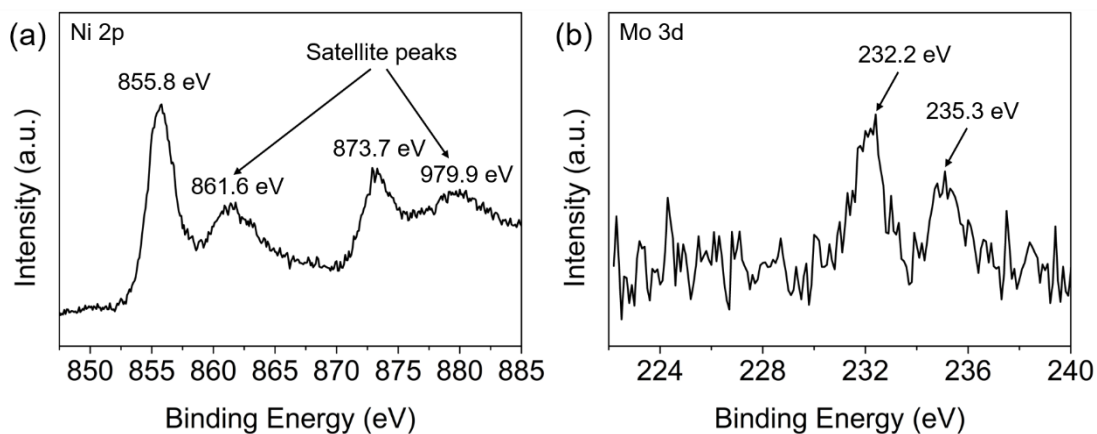

Fig. S12. High-resolution XPS spectra of (f) Ni 2p and (g) Mo 3d in Ni-Mo/Ni/n<sup>++</sup>-Si electrode after 100 h continuous OER operation.

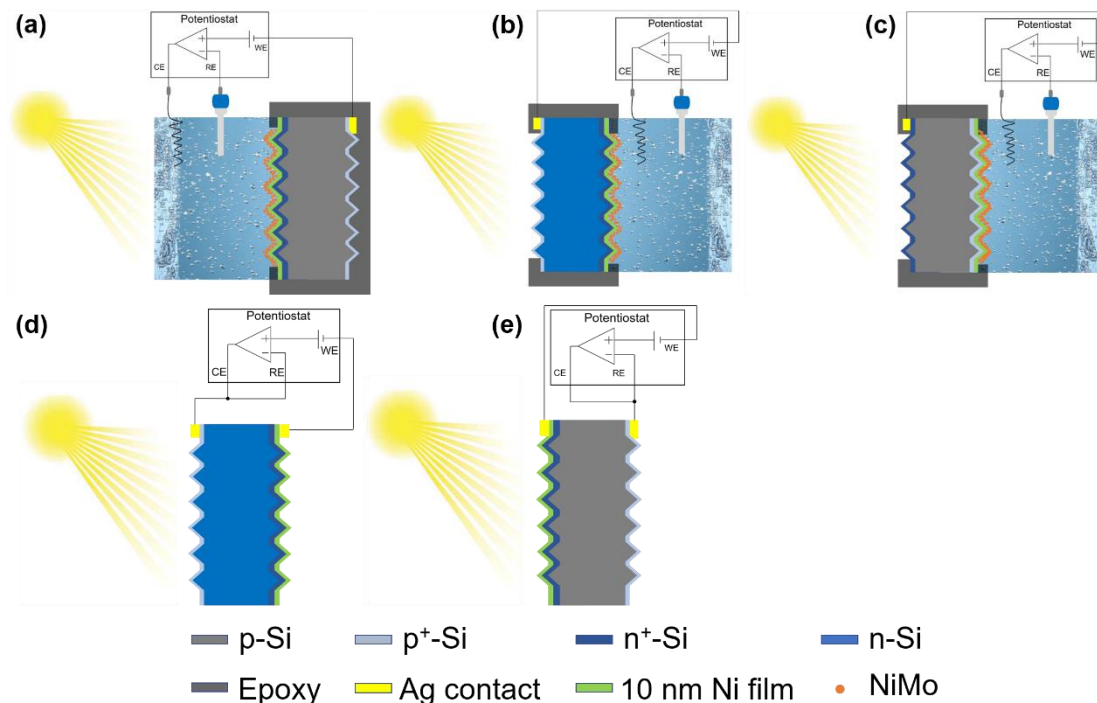

Fig. S13. (a) Schematic overview of the HER measurement setup for n<sup>+</sup>pp<sup>+</sup>-Si photocathodes. (b) Schematic overview of the HER measurement setup for n<sup>+</sup>np<sup>+</sup>-Si photocathodes. (c) Schematic overview of the OER measurement setup for p<sup>+</sup>pn<sup>+</sup>-Si photoanodes. (d) Schematic overview of the LSV measurement setup for n<sup>+</sup>np<sup>+</sup>-Si PV cells. (e) Schematic overview of the LSV measurement setup for n<sup>+</sup>pp<sup>+</sup>-Si PV cells.

Fig. S13 gives a schematic representation of how the potentiostat is connected to the samples to measure the PEC or PV performance of various samples. The samples are placed in the dark or under AM1.5 G 1 sun illumination (100 mW/cm<sup>2</sup>). CE is the counter electrode, RE is the reference electrode, and WE is the working electrode. Fig. S13d and e shows a schematic setup used to measure the LSV curves of the underlying PV cell. Note that the RE and CE are connected together at one side and that the WE is connected at the other side.

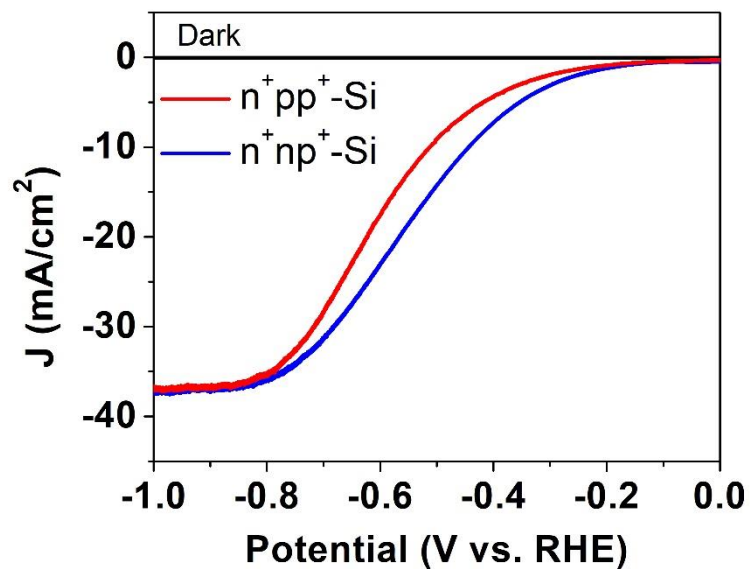

Fig. S14. LSV curves of bare  $n^+pp^+-Si$  and  $n^+np^+-Si$  photocathodes recorded in 1 M KOH solution (pH = 13.6) in the dark and under simulated AM1.5 G illumination ( $100 \text{ mW/cm}^2$ ), respectively.

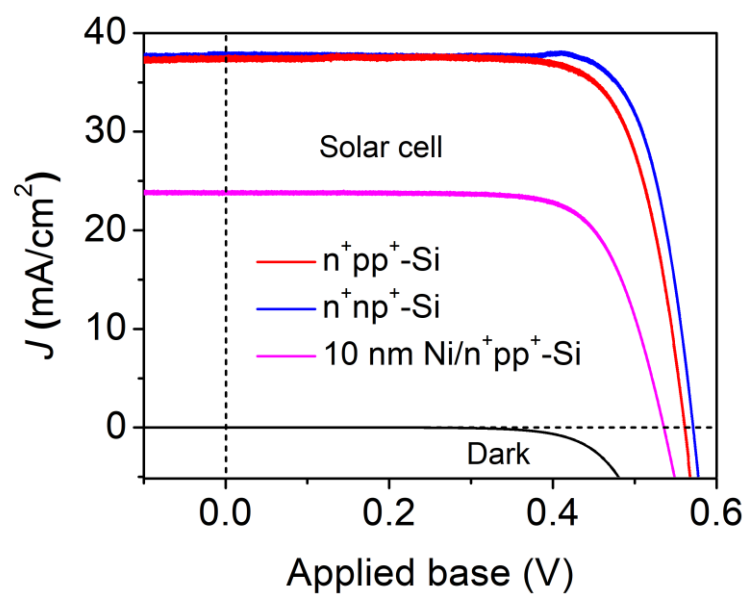

Fig. S15. LSV curves of bare  $n^+pp^+-Si$ ,  $n^+np^+-Si$  and 10 nm Ni coated  $n^+pp^+-Si$  fabricated as solid-state Si PV cells.

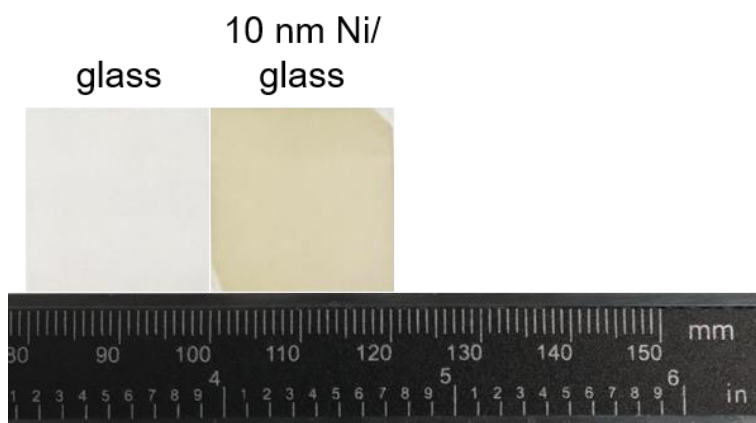

Fig. S16. Optical images of a transparent glass coated with and without 10 nm Ni.

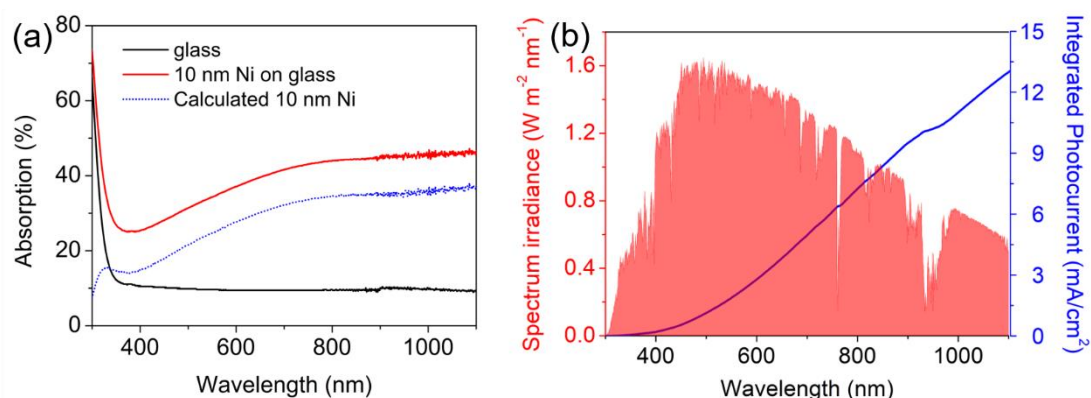

Fig. S17. (a) The UV–Vis absorption spectra of bare glass substrate, 10 nm Ni film on glass substrate and the calculated 10 nm Ni film, using a UV–vis–NIR spectrophotometer (UV-3600, Shimadzu). Considering the bandgap of Si (1.12 eV), the UV–Vis absorption spectra were conducted in the wavelength region of 300–1100 nm. (b) Integrated photocurrent density absorbed by 10 nm Ni film by integrating the absorption spectra in (a) with the standard solar spectrum of AM 1.5G (ASTM G173-03). An integrated photocurrent density of 13.0 mA/cm<sup>2</sup> (blue curve) was estimated, which is close to the difference in  $J_s$  (13.8 mA/cm<sup>2</sup>) between bare n<sup>+</sup>pp<sup>+</sup>-Si and 10 nm Ni coated n<sup>+</sup>pp<sup>+</sup>-Si measured in Fig. S15.

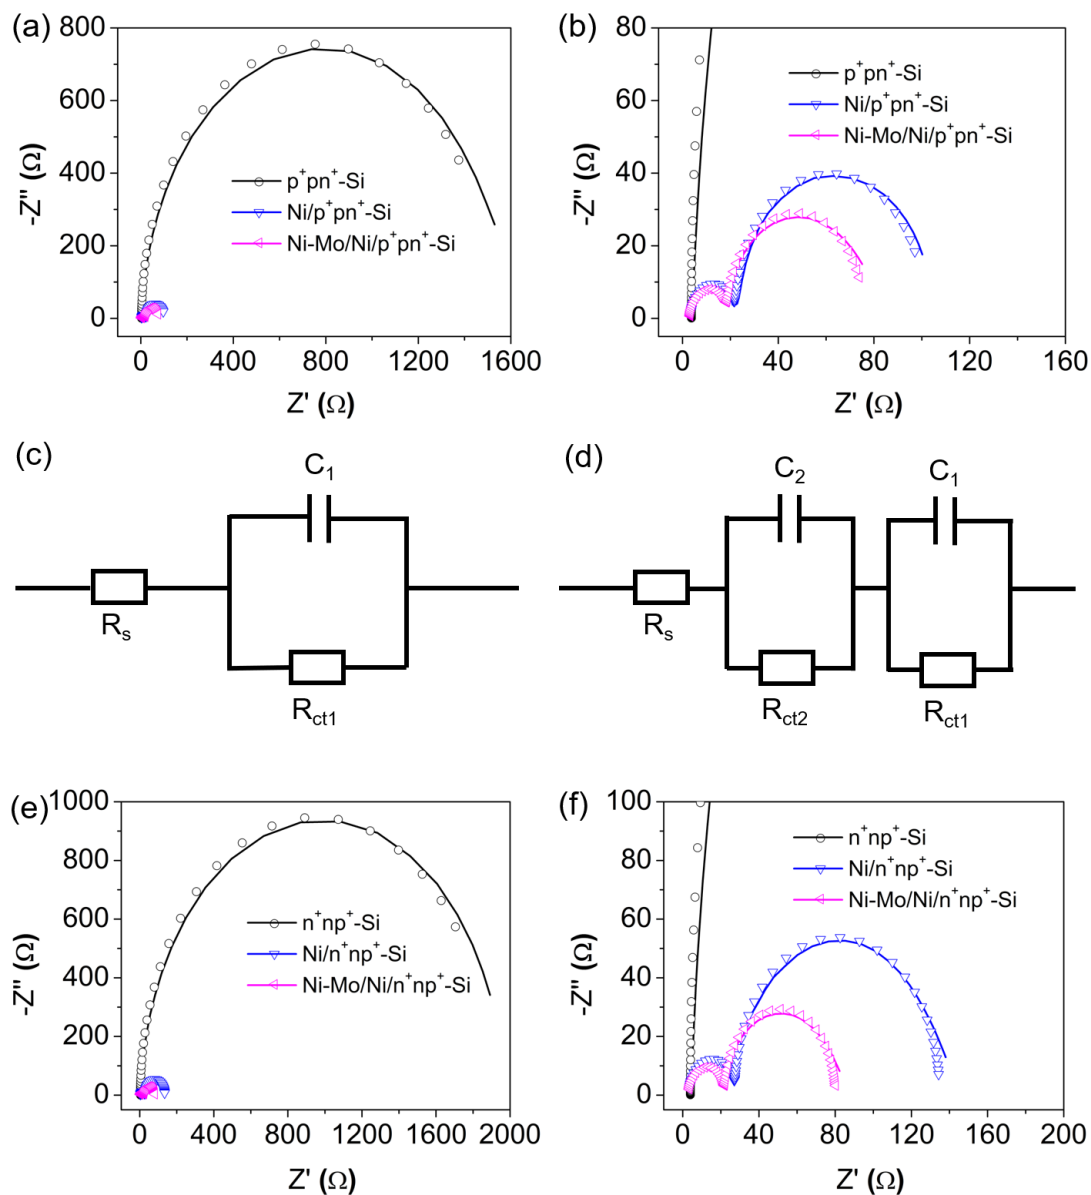

Fig. S18. (a) Nyquist plots of  $n^+np^+$ -Si photocathodes with and without Ni and Ni-Mo/Ni catalyst measured at  $-0.2 V_{RHE}$  under AM1.5G 1 sun illumination. (b) zoomed view of (a) to show the EIS spectra at small impedance region more clearly. The equivalent circuits for (c) pure  $n^+np^+$ -Si photocathode and  $p^+pn^+$ -Si photoanode, and for (d)  $n^+np^+$ -Si photocathodes and  $p^+pn^+$ -Si photoanode with Ni or Ni-Mo/Ni catalyst. (e) Nyquist plots of  $p^+pn^+$ -Si photoanodes with and without Ni and Ni-Mo/Ni catalyst measured at  $1.4 V_{RHE}$  under AM1.5G 1 sun illumination. (f) zoomed view of (e) to show the EIS spectra at small impedance region more clearly. The solid line traces correspond to the fitting using the corresponding equivalent circuit.

In (c), (d),  $R_s$  represents series resistance of the whole circuit. In (c),  $R_{ct,1}$  represents the charge-transfer resistance from the Si photoelectrode to the electrolyte. and  $C_1$  is the capacitance of the corresponding Si photoelectrode/electrolyte junction. In (d),  $R_{ct,1}$  represents charge-transfer resistance from Si photoelectrode to Ni or Ni-Mo catalyst and  $C_1$  is the capacitance of the corresponding Si photoelectrode/catalyst junction,  $R_{ct,2}$  represents the charge-transfer resistance from the Ni or Ni-Mo catalyst to the electrolyte and  $C_2$  is the capacitance of the corresponding catalyst/electrolyte junction.

The bare  $n^+np^+$ -Si photocathodes displayed a large semicircle in the Nyquist plot (Fig. S18a), corresponding to the large resistance of direct charge transfer between the semiconductor Si and electrolyte. In contrast, the Ni/ $n^+np^+$ -Si and Ni-Mo/Ni/ $n^+np^+$ -Si photocathodes each exhibit two small semicircles. The one in high frequency range is related to the charge transfer in the interface of catalyst/Si and the other in low frequency range signifies the charge transfer of double layer at catalyst/electrolyte interface.

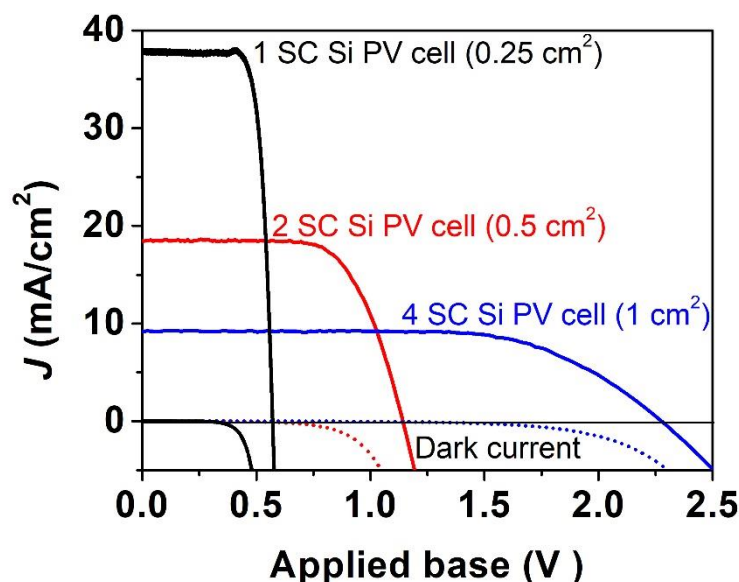

Fig. S19. LSV curves of SC Si PV cells under dark and AM1.5G 1 sun illumination. Black, red, and blue correspond to 1 cell ( $0.25 \text{ cm}^2$ ), 2 cells ( $0.5 \text{ cm}^2$ ), and 4 cells ( $1 \text{ cm}^2$ ), respectively.

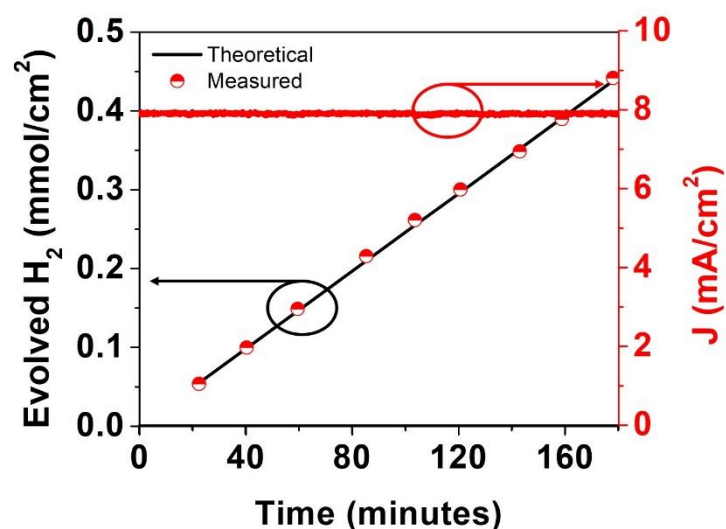

Fig. S20. Hydrogen gas evolution of the combined PV-PEC system was measured as a function of time at a zero bias in 1 M KOH under stimulated 1 sun AM 1.5G illumination.

The calculated  $H_2$  production from photocurrent is also shown. The Faradaic efficiency ( $\eta_F$ ) is obtained according the following equation:

$$\eta_F (\%) = \frac{2 \times \text{produced } H_2 (\text{mol} \cdot \text{cm}^{-2}) \times 96485 (\text{s} \cdot \text{A} \cdot \text{mol}^{-1})}{\text{photocurrent density} (\text{A} \cdot \text{cm}^{-2}) \times \text{time} (\text{s})} \times 100\%$$

The measured and theoretical hydrogen evolution agrees very well, confirming a nearly  $\eta_F$  of 100 % for the combined PV-PEC system.

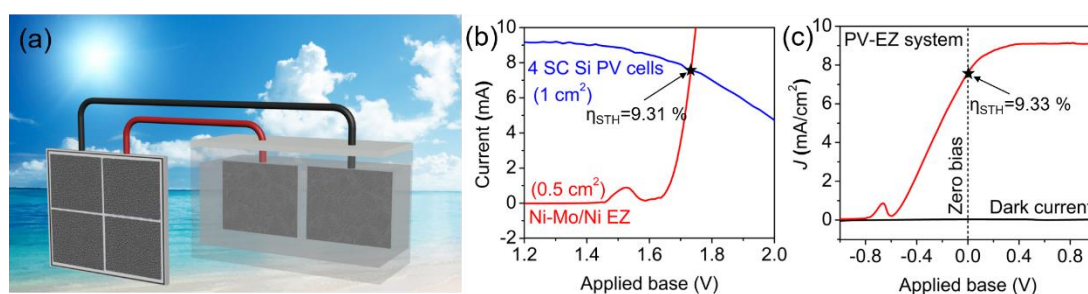

Fig. S21. Unassisted water splitting by using the combination of Ni-Mo/Ni electrolyzer and 4 SC Si PV cells. (a) Schematic illustration of the combined PV- EZ system. (b) Two-electrode LSV curves of the Ni-Mo/Ni electrolyzer under dark (red). Also shown are the LSV curves of 4 SC Si PV cells under AM1.5G 1 sun illumination (blue). Details of the 4 SC Si PV cells is shown in Fig. 17. Estimated  $\eta_{STH}$  for the combined PV-EZ

system is marked on the crossing point. (c) Two-electrode LSV curves of the combined PV-EZ system recorded in 1 M KOH under AM1.5G 1 sun illumination, showing the experimental  $\eta_{\text{STH}}$ .

Table S1. The corresponding Ni<sub>4</sub>Mo electrocatalyst: XPS peak position, valence state and atomic ratio.

| Peak                 | BE (eV) | Valence State | Atomic ratio (%) |
|----------------------|---------|---------------|------------------|
| Ni 2p <sub>1/2</sub> | 870.1   | 0             | 85               |
| Ni 2p <sub>3/2</sub> | 852.8   |               |                  |
| Mo 3d <sub>3/2</sub> | 231.2   | 0             | 15               |
| Mo 3d <sub>5/2</sub> | 228.0   |               |                  |

Table S2. Characteristic parameters of the various photoelectrodes from the PEC LSV curves in Fig. 3.

|                        | $J_s$ (mA/cm <sup>2</sup> ) | $J_0$ (mA/cm <sup>2</sup> ) | $V_o$ (V <sub>RHE</sub> ) | $\eta$ (%) |
|------------------------|-----------------------------|-----------------------------|---------------------------|------------|
| $n^+pp^+-Si$           | -36.9                       | -0.2                        | -0.21                     | –          |
| Ni/ $n^+pp^+-Si$       | -23.7                       | -13.7                       | 0.21                      | 0.60       |
| Ni–Mo/Ni/ $n^+pp^+-Si$ | -21.1                       | -20.3                       | 0.40                      | 3.28       |
| $n^+np^+-Si$           | -37.1                       | -0.3                        | -0.18                     | –          |
| Ni/ $n^+np^+-Si$       | -37.0                       | -30.2                       | 0.29                      | 2.17       |
| Ni–Mo/Ni/ $n^+np^+-Si$ | -37.0                       | -36.3                       | 0.50                      | 6.90       |
| Ni/ $p^+pn^+-Si$       | 37.0                        | 18.2                        | 1.07                      | 0.60       |
| Ni–Mo/Ni/ $p^+pn^+-Si$ | 37.0                        | 34.5                        | 0.94                      | 3.11       |

Table S3. Summary of PEC performance of state-of-the-art Si photocathodes coated with earth-abundant catalysts.

|                                                                             | $J_0$<br>(mA/cm <sup>2</sup> ) | $V_0$<br>(V <sub>RHE</sub> ) | ABPE<br>(%) | Stability<br>(h) | Electrolyte                             | Light<br>intensity<br>(mW cm <sup>-2</sup> ) | Ref.                                                   |
|-----------------------------------------------------------------------------|--------------------------------|------------------------------|-------------|------------------|-----------------------------------------|----------------------------------------------|--------------------------------------------------------|
| Ni-Mo/Ni/n <sup>+</sup> np <sup>+</sup> -Si                                 | -36.3                          | 0.50                         | 6.90        | 100              | 1 M KOH                                 | 100                                          | This work                                              |
| NiFe LDH/Ti/p-Si                                                            | -7                             | ~0.3                         | < 0.5       | 24               | 1 M KOH                                 | 100                                          | ACS Energy Lett.<br>2017, 2,<br>1939–1946              |
| Ni/Ti/p-Si                                                                  | -17                            | ~0.3                         | < 0.5       | 12               | 1 M KOH                                 | 225                                          | Nano Res. 2015,<br>8(5): 1577–1583                     |
| Si@CoSe <sub>2</sub> MWs                                                    | -3.83                          | 0.218                        | < 0.5       | 6                | 1 M KOH                                 | 100                                          | ACS Appl. Mater.<br>Interfaces 2016, 8,<br>5400–5407   |
| NiO <sub>x</sub> /SiO <sub>2</sub> /p-Si                                    | ~-31                           | ~0.8                         | ~3.1        | 1                | 1 M KOH                                 | 100                                          | ACS Appl. Mater.<br>Interfaces 2018, 10,<br>7955–7962  |
| Ni-Mo/NiSi/n <sup>+</sup> p-Si microwires                                   | -29.8                          | 0.55                         | 10.1        | 288              | 1 M KOH                                 | 100                                          | ACS Energy Lett.<br>2018, 3,<br>1086–1092              |
| NiMo/n <sup>+</sup> p-Si                                                    | 22.3                           | 0.53                         | 3.6         | –                | KHP, pH =<br>4.5                        | 100                                          | Energy Environ.<br>Sci. 2012, 5, 9653-<br>9661         |
| MoS <sub>2</sub> /n <sup>+</sup> p-Si                                       | 17                             | 0.32                         | < 2         | 100              | 0.5 M<br>H <sub>2</sub> SO <sub>4</sub> | 100                                          | Adv. Energy Mater.<br>2014, 1400739                    |
| MoS <sub>x</sub> Cl <sub>y</sub> /n <sup>+</sup> pp <sup>+</sup> -Si<br>MPs | 43                             | 0.41                         | ~6          | 2                | 0.5 M<br>H <sub>2</sub> SO <sub>4</sub> | 100                                          | Adv. Mater. 2015,<br>27, 6511–6518                     |
| CoPS/n <sup>+</sup> pp <sup>+</sup> -Si<br>MPs                              | 26                             | 0.42                         | 4.7         | –                | 0.5 M<br>H <sub>2</sub> SO <sub>4</sub> | 100                                          | Nat. Mater. 2015,<br>14, 1245-1251                     |
| NiMo/TiO <sub>2</sub> /n <sup>+</sup> p-Si<br>microwire                     | 14.3                           | 0.42                         | 2.9         | 7                | 0.5 M<br>H <sub>2</sub> SO <sub>4</sub> | 100                                          | Energy Environ.<br>Sci. 2015, 8, 2977-<br>2984         |
| MoS <sub>2</sub> /Al <sub>2</sub> O <sub>3</sub> /n <sup>+</sup> p-Si       | 35.6                           | 0.4                          | 3.6         | 120              | 1 M HClO <sub>4</sub>                   | 100                                          | ACS Appl. Mater.<br>Interfaces 2017, 9,<br>6123–6129   |
| MoSe <sub>2</sub> /n <sup>+</sup> p-Si                                      | 29.3                           | 0.4                          | 3.8         | 120              | 1 M HClO <sub>4</sub>                   | 100                                          | Appl. Phys. Lett.<br>2018, 112, 013902                 |
| Co-W-S/Ti/n <sup>+</sup> p-Si                                               | -30.4                          | 0.36                         | 4.00        | 144              | 1 M HClO <sub>4</sub>                   | 100                                          | Appl. Catal. B:<br>Environmental 237<br>(2018) 158–165 |

Table S4. Summary of PEC performance of state-of-the-art Si based photoanodes.

|                                                              | $J_0$<br>(mA/cm <sup>2</sup> ) | $V_o$<br>(V <sub>RHE</sub> ) | ABPE<br>(%) | Stability<br>(h) | Electrolyte                        | Light<br>intensity<br>(mW cm <sup>-2</sup> ) | Ref.                                       |
|--------------------------------------------------------------|--------------------------------|------------------------------|-------------|------------------|------------------------------------|----------------------------------------------|--------------------------------------------|
| Ni-Mo/Ni/p <sup>+</sup> np <sup>+</sup> -Si                  | 37                             | 0.94                         | 3.11        | 100              | 1 M KOH                            | 100                                          | This work                                  |
| FeNiCoO <sub>x</sub> /TiO <sub>2</sub> /Graphene/n-Si        | ~7                             | 1                            | < 0.5       | 6                | 1 M KOH                            | 100                                          | Sustainable Energy Fuels, 2018, 2, 663–672 |
| Ni/Pt/Al <sub>2</sub> O <sub>3</sub> /SiO <sub>x</sub> /n-Si | 19.2                           | 0.997                        | ~1          | 200              | 1 M KOH                            | 100                                          | Nature Commun. 2017, 8, 15968–             |
| Ni <sub>80</sub> Fe <sub>20</sub> /TiO <sub>2</sub> /n-Si    | 21.5                           | 1.06                         | < 1         | 10               | 1 M KOH                            | 100                                          | ACS Catal. 2017, 7, 3277–3283              |
| CoO <sub>x</sub> /p <sup>+</sup> n-Si                        | 30.8                           | ~1                           | ~1.5        | 72               | 1 M KOH                            | 100                                          | Nat. Mater. 2017, 16, 335–341              |
| NiFe/SiO <sub>x</sub> /np <sup>+</sup> -Si                   | 30.7                           | 0.89                         | 3.3         | 13               | 1 M KOH                            | 100                                          | Adv. Energy Mater. 2016, 1601805           |
| CoO <sub>x</sub> /SiO <sub>x</sub> /n-Si                     | 23.2                           | 1.02                         | 1.42        | 2500             | 1 M KOH                            | 100                                          | Energy Environ. Sci. 2016, 9, 892–897      |
| NiFe/NiCo <sub>2</sub> O <sub>4</sub> /np <sup>+</sup> -Si   | > 25                           | 0.95                         | ~1.5        | 72               | 1 M KOH                            | 100                                          | J. Am. Chem. Soc. 2015, 137, 9595–9603     |
| NiO <sub>x</sub> /CoO <sub>x</sub> /SiO <sub>x</sub> /n-Si   | 27.7                           | 0.99                         | 2.1         | 1700             | 1 M KOH                            | 100                                          | Energy Environ. Sci. 2015, 8, 2644–2649    |
| NiO <sub>x</sub> /np <sup>+</sup> -Si                        | 29                             | 1.05                         | 2.1         | 1200             | 1 M KOH                            | 100                                          | J. Phys. Chem. Lett. 2015, 6, 592–598      |
| Ni/TiO <sub>2</sub> /np <sup>+</sup> -Si                     | 11                             | 1.08                         | < 0.5       | 110              | 1 M KOH                            | 100                                          | Science 2014, 344, 1005–1009               |
| CoO <sub>x</sub> /SiO <sub>x</sub> /np <sup>+</sup> -Si      | 17                             | ~1.05                        | < 1         | 24               | 1 M KOH                            | 100                                          | J. Am. Chem. Soc. 2014, 136, 6191–6194     |
| IrO <sub>x</sub> /Ir/p <sup>+</sup> n-Si                     | 13.8                           | 1.05                         | < 2         | 18               | 1 M H <sub>2</sub> SO <sub>4</sub> | 38.6 (λ > 635 nm, AM 1.5G)                   | J. Phys. Chem. Lett. 2014, 5, 1948–1952    |
| Fe-NiO/p <sup>+</sup> n-Si                                   | 17                             | ~1.05                        | ~2          | 300              | 1 M KOH                            | 38.6 (λ > 635 nm, AM 1.5G)                   | J. Phys. Chem. Lett. 2014, 5, 3456–3461    |

Table S5. The fitted value of charge transfer resistance and capacitance values for  $n^+np^+$ -Si photocathodes and  $p^+pn^+$ -Si photoanode with and without the Ni and Ni-Mo/Ni catalyst using the equivalent circuits listed in Fig. 16c and d.

| Photoelectrodes                      | $C_2$ (F)            | $R_{ct,2}$ ( $\Omega$ ) | $C_1$ (F)            | $R_{ct,1}$ ( $\Omega$ ) | $R_{ct,1} + R_{ct,2}$<br>( $\Omega$ ) |
|--------------------------------------|----------------------|-------------------------|----------------------|-------------------------|---------------------------------------|
| $n^+np^+$ -Si photocathode           | —                    | —                       | $2.3 \times 10^{-5}$ | 1510.1                  | 1510.1                                |
| Ni/ $n^+np^+$ -Si photocathode       | $9.5 \times 10^{-7}$ | 19.1                    | $5.9 \times 10^{-5}$ | 79.2                    | 98.3                                  |
| Ni-Mo/Ni/ $n^+np^+$ -Si photocathode | $1.1 \times 10^{-6}$ | 16.3                    | $1.5 \times 10^{-4}$ | 57.0                    | 73.3                                  |
| $p^+pn^+$ -Si photoanode             | —                    | —                       | $1.9 \times 10^{-5}$ | 1895.2                  | 1895.2                                |
| Ni/ $p^+pn^+$ -Si photoanode         | $7.3 \times 10^{-7}$ | 24.6                    | $6.7 \times 10^{-5}$ | 107.0                   | 131.6                                 |
| Ni-Mo/Ni/ $p^+pn^+$ -Si photoanode   | $9.4 \times 10^{-7}$ | 19.3                    | $1.3 \times 10^{-4}$ | 58.2                    | 77.5                                  |

Table S6. Summary of state-of-the-art unassisted solar water splitting based on PV–PEC configuration.

| PV–PEC configuration                                                                                         | PV cells          |                | $\eta_{\text{STH}}$<br>(%) | Stability<br>(h) | Ref.                                               |
|--------------------------------------------------------------------------------------------------------------|-------------------|----------------|----------------------------|------------------|----------------------------------------------------|
|                                                                                                              | Efficiency<br>(%) | Fill<br>Factor |                            |                  |                                                    |
| 2 SC Si PV cells–Ni–Mo/Ni/n <sup>+</sup> np <sup>+</sup> –Si and Ni–Mo/Ni/p <sup>+</sup> pn <sup>+</sup> –Si | 14.3              | 0.684          | 9.8                        | 105              | This Work                                          |
| 2 SC c-Si PV cells–CoP/H/1% Mo:BiVO <sub>4</sub> and CoP/Ni foam                                             | 13.27             | –              | 5.3                        | 2                | J. Mater. Chem. A, 2018, 6, 1266–1274.             |
| 2 SC c-Si PV cells–BiVO <sub>4</sub> and Fe <sub>2</sub> O <sub>3</sub>                                      | 16.74             | 0.63           | 7.7                        | 8                | Nat. Comm. 2016, 7, 13380.                         |
| Perovskite cell–Fe(Ni)OOH/Mo:BiVO <sub>4</sub>                                                               | 15.5              | 0.747          | 6.2                        | 10               | Sci. Adv. 2016; 2: e1501764                        |
| nc-Si:H/SHJ hybrid PV cell–Pt/TiO <sub>2</sub> /a-SiC:H                                                      | 10                | 0.701          | 7.9                        | –                | Solar Energy Mater. Solar Cells, 2016, 150, 82–87. |
| Perovskite cell–Pt/TiO <sub>2</sub> /ZnO/CdS/CuIn <sub>x</sub> Ga <sub>1–x</sub> Se <sub>2</sub>             | ~8                | –              | 6.3                        | 1                | Adv. Energy Mater. 2015, 5, 1501520.               |
| GaAs/InGaAsP/InP PV cell–Pt and Co–Pi/BiVO <sub>4</sub> /WO <sub>3</sub>                                     | ~7                | –              | 8.1                        | 1                | Sci. Rep. 2015, 5, 11141.                          |
| a-Si:H/nc-Si:H PV cell–Co–Pi/BiVO <sub>4</sub> :W                                                            | 9.6               | 0.624          | 5.2                        | –                | ChemSusChem 2014, 7, 2832–2838.                    |
| 3 junction a-Si PV cell–Ni and FeOOH/Mo:BiVO <sub>4</sub>                                                    | ~14               | –              | 2.5                        | 12               | Phys. Chem. Chem. Phys., 2014, 16, 15608–15614.    |
| Double-junction a-Si PV cell–Co–Pi/BiVO <sub>4</sub> :W                                                      | ~10               | –              | 4.9                        | 1                | Nat. Comm. 2013, 4, 2195.                          |
| Dye-sensitized PV cell–Pt/WO <sub>3</sub>                                                                    | ~6                | –              | 3.1                        | 9                | Nat. Photonics 2012, 6, 824–828.                   |

Table S7. Summary of state-of-the-art unassisted solar water splitting with Si-based PV–EZ configuration.

| PV–EZ configuration                                        | PV cells       |             | $\eta_{\text{STH}}$ | Stability (h) | Ref.                                                    |
|------------------------------------------------------------|----------------|-------------|---------------------|---------------|---------------------------------------------------------|
|                                                            | Efficiency (%) | Fill Factor |                     |               |                                                         |
| 4 SC Si PV cells–Ni-Mo/Ni EZs                              | 13.5           | 0.619       | 9.3                 | 105           | This work                                               |
| 3 SC Si PV cells–Ni-Co-S/Ni-Co-P EZ                        | 14.4           | 0.621       | 10.8                | 48            | J. Mater. Chem. A, 2018, 6, 20297-20303.                |
| 4 SC Si heterojunction PV cells–NiFe inverse opal EZs      | 14.49          | 0.593       | 9.54                | 25            | Nano Energy 2017, 42, 1–7.                              |
| 3 SC Si heterojunction PV cells–Pt and IrOx on Ni foam EZs | 20.6           | 0.832       | 14.2                | 100           | J. Electrochem. Soc., 2016, 163, F1177-F1181.           |
| Pt/Ag/a-Si:H/a-Si:H–RuO <sub>2</sub> EZ                    | 9.9            | 0.778       | 6.8                 | 50            | Solar Energy Mater. Solar Cells, 2015, 140, 275–280.    |
| Four single junction c-Si–NiBi and NiMoZn EZs              | 16             | 0.769       | ~9.7                | 168           | Proc. Natl. Acad. Sci. U. S. A. 2014, 111, 14057-14061. |
| 3 junction a-Si–Co-OEC and NiMoZn EZs                      | 9              | 0.57        | 4.7                 | 0.2           | Science 2011, 334, 645-648.                             |
| 4 Si PV arrays–Avalence high presure EZ                    | 18.5           | 0.593       | 9.3                 | ~372          | Int. J. Hydrogen Energy 2008, 33, 2747-2764.            |
